# Supplementary material
Source: PubMed Central journal article supplement (PMC9259680)
Supplement: 42003_2022_3630_MOESM2_ESM.pdf [file 42003_2022_3630_MOESM2_ESM.pdf]

Supplementary Information for

**A panel of nanobodies recognizing conserved hidden clefts of all SARS-CoV-2 spike variants including  
Omicron**

**Ryota Maeda\*, Junso Fujita, Yoshinobu Konishi, Yasuhiro Kazuma, Hiroyuki Yamazaki, Itsuki Anzai,  
Tokiko Watanabe, Keishi Yamaguchi, Kazuki Kasai, Kayoko Nagata, Yutaro Yamaoka, Kei  
Miyakawa, Akihide Ryo, Kotaro Shirakawa, Kei Sato, Fumiaki Makino, Yoshiharu Matsuura,  
Tsuyoshi Inoue, Akihiro Imura\*, Keiichi Namba\*, and Akifumi Takaori-Kondo\***

\*Correspondences:

maeda@cognano.co.jp (R.M.) COGNANO Inc., Kyoto, 601-1255, Japan.

akihiroimura@cognano.co.jp (A.I.) COGNANO Inc., Kyoto, 601-1255, Japan.

keiichi@fbs.osaka-u.ac.jp (Ke.N.) Graduate School of Frontier Biosciences, Osaka University, Osaka 565-0871, Japan.

atakaori@kuhp.kyoto-u.ac.jp (A.T.-K.) Department of Haematology and Oncology, Graduate School of Medicine, Kyoto University, Kyoto 606-8507, Japan.

This PDF file includes:

Supplementary Figures 1 to 11

Supplementary Table 1

Supplementary Figure 1

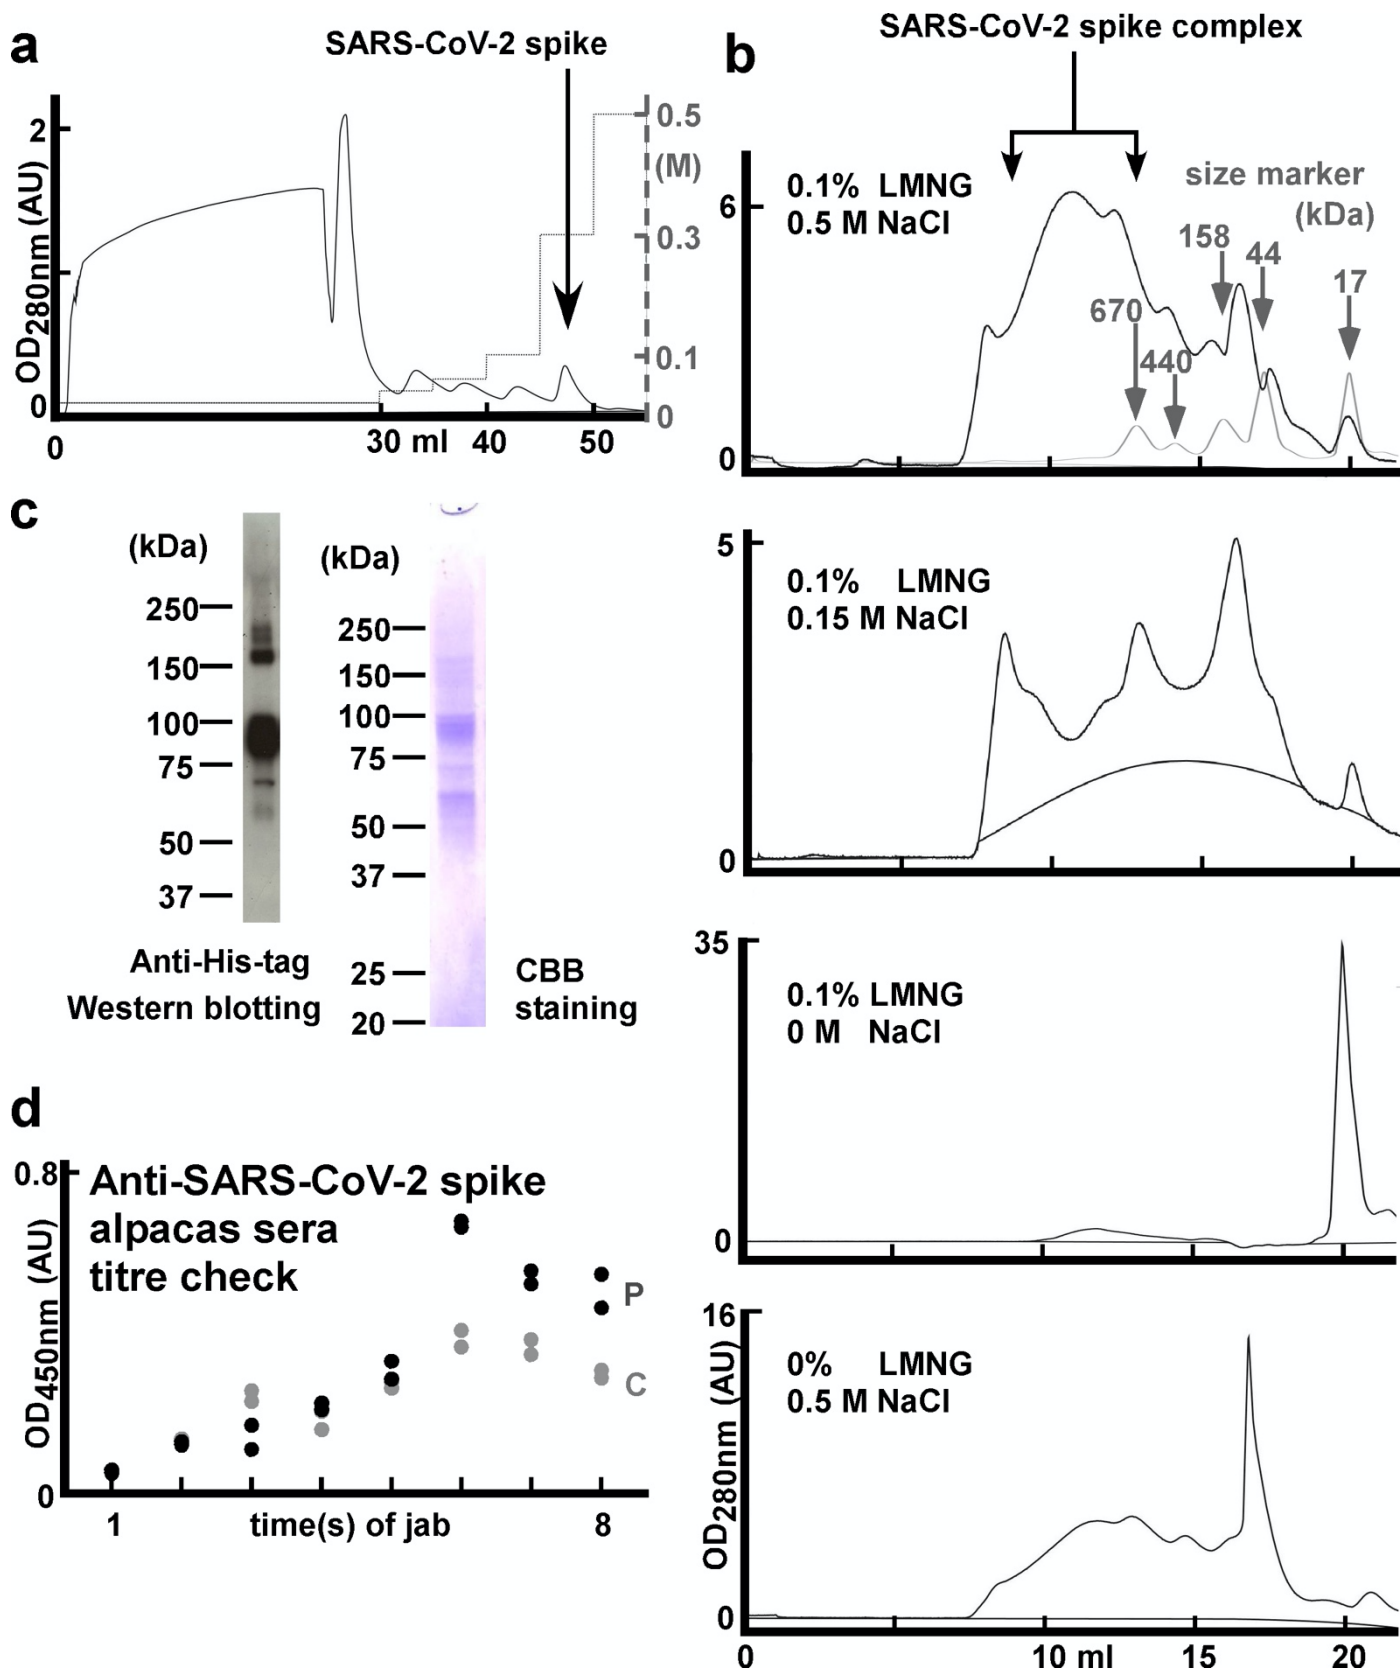

**Supplementary Figure 1| Purification of the extracellular SARS-CoV-2 spike complex.** **a**, A chromatogram of the first purification step of the SARS-CoV-2 spike from HEK cell lysate using a nickel column: absorbance units (AU) of  $UV_{280nm}$ , amounts (ml) of buffer, concentrations (M) of imidazole, and the elution peak containing the SARS-CoV-2 spike. **b**, Chromatograms of the size-exclusion gel filtration of the recombinant SARS-CoV-2 spike complex under different conditions (concentrations of NaCl and LMNG). The first chromatogram is overlaid with those for marker proteins (arrowed). Two arrows indicate the elution peak of the SARS-CoV-2 spike. **c**, Western blotting analysis of the purified SARS-CoV-2 spike using an anti-His antibody and Coomassie Brilliant Blue (CBB) staining. **d**, Serum titres of the immunized alpacas—named P: Puta and C: Christy—for the SARS-CoV-2 spike were measured via ELISA and plotted.

Supplementary Figure 2

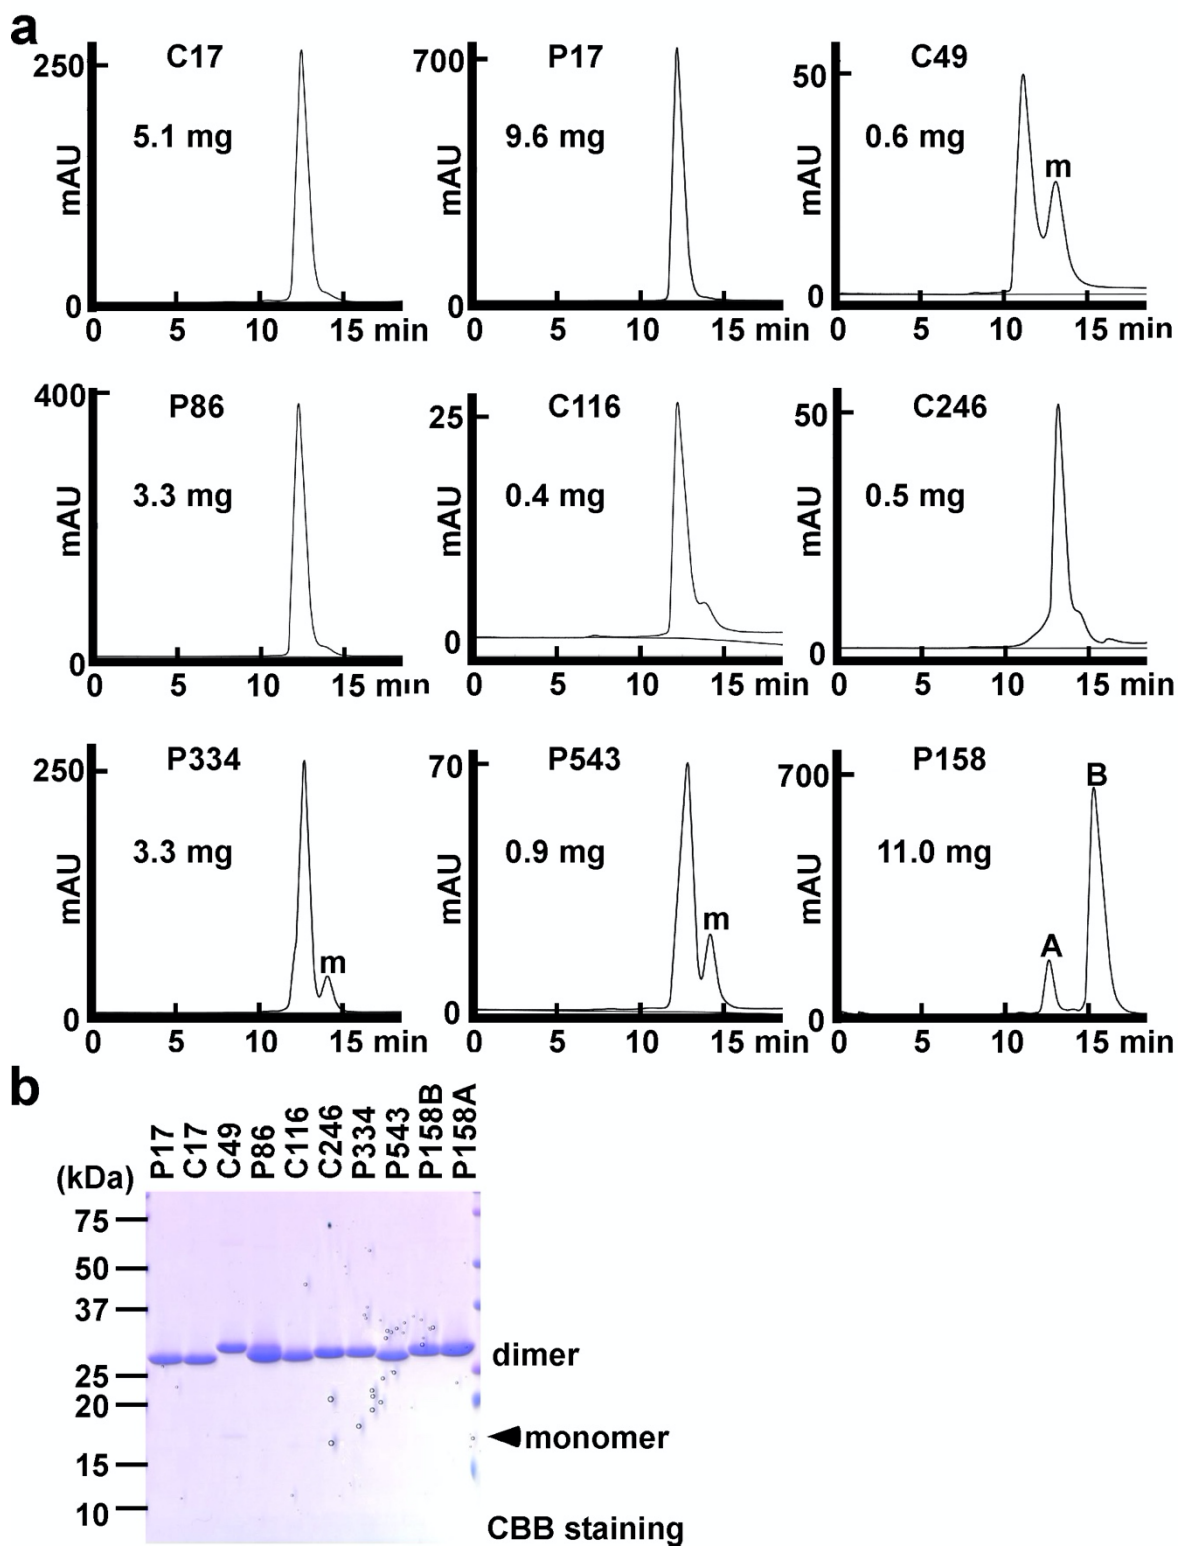

**Supplementary Figure 2| Purification of the clones.** **a**, Chromatograms showing the final purification step of the indicated clones: subpeaks confirmed as cleaved monomers are marked (m); the amounts of purified clones in dimers from 1 L-culture of BL21 bacteria are shown in insets. The dimer peaks observed for P158 are named A and B. **b**, The purified clones were analysed using CBB staining (m; cleaved monomer). Both the A and B peaks of P158 showed no differences via SDS-PAGE analysis.



Supplementary Figure 3

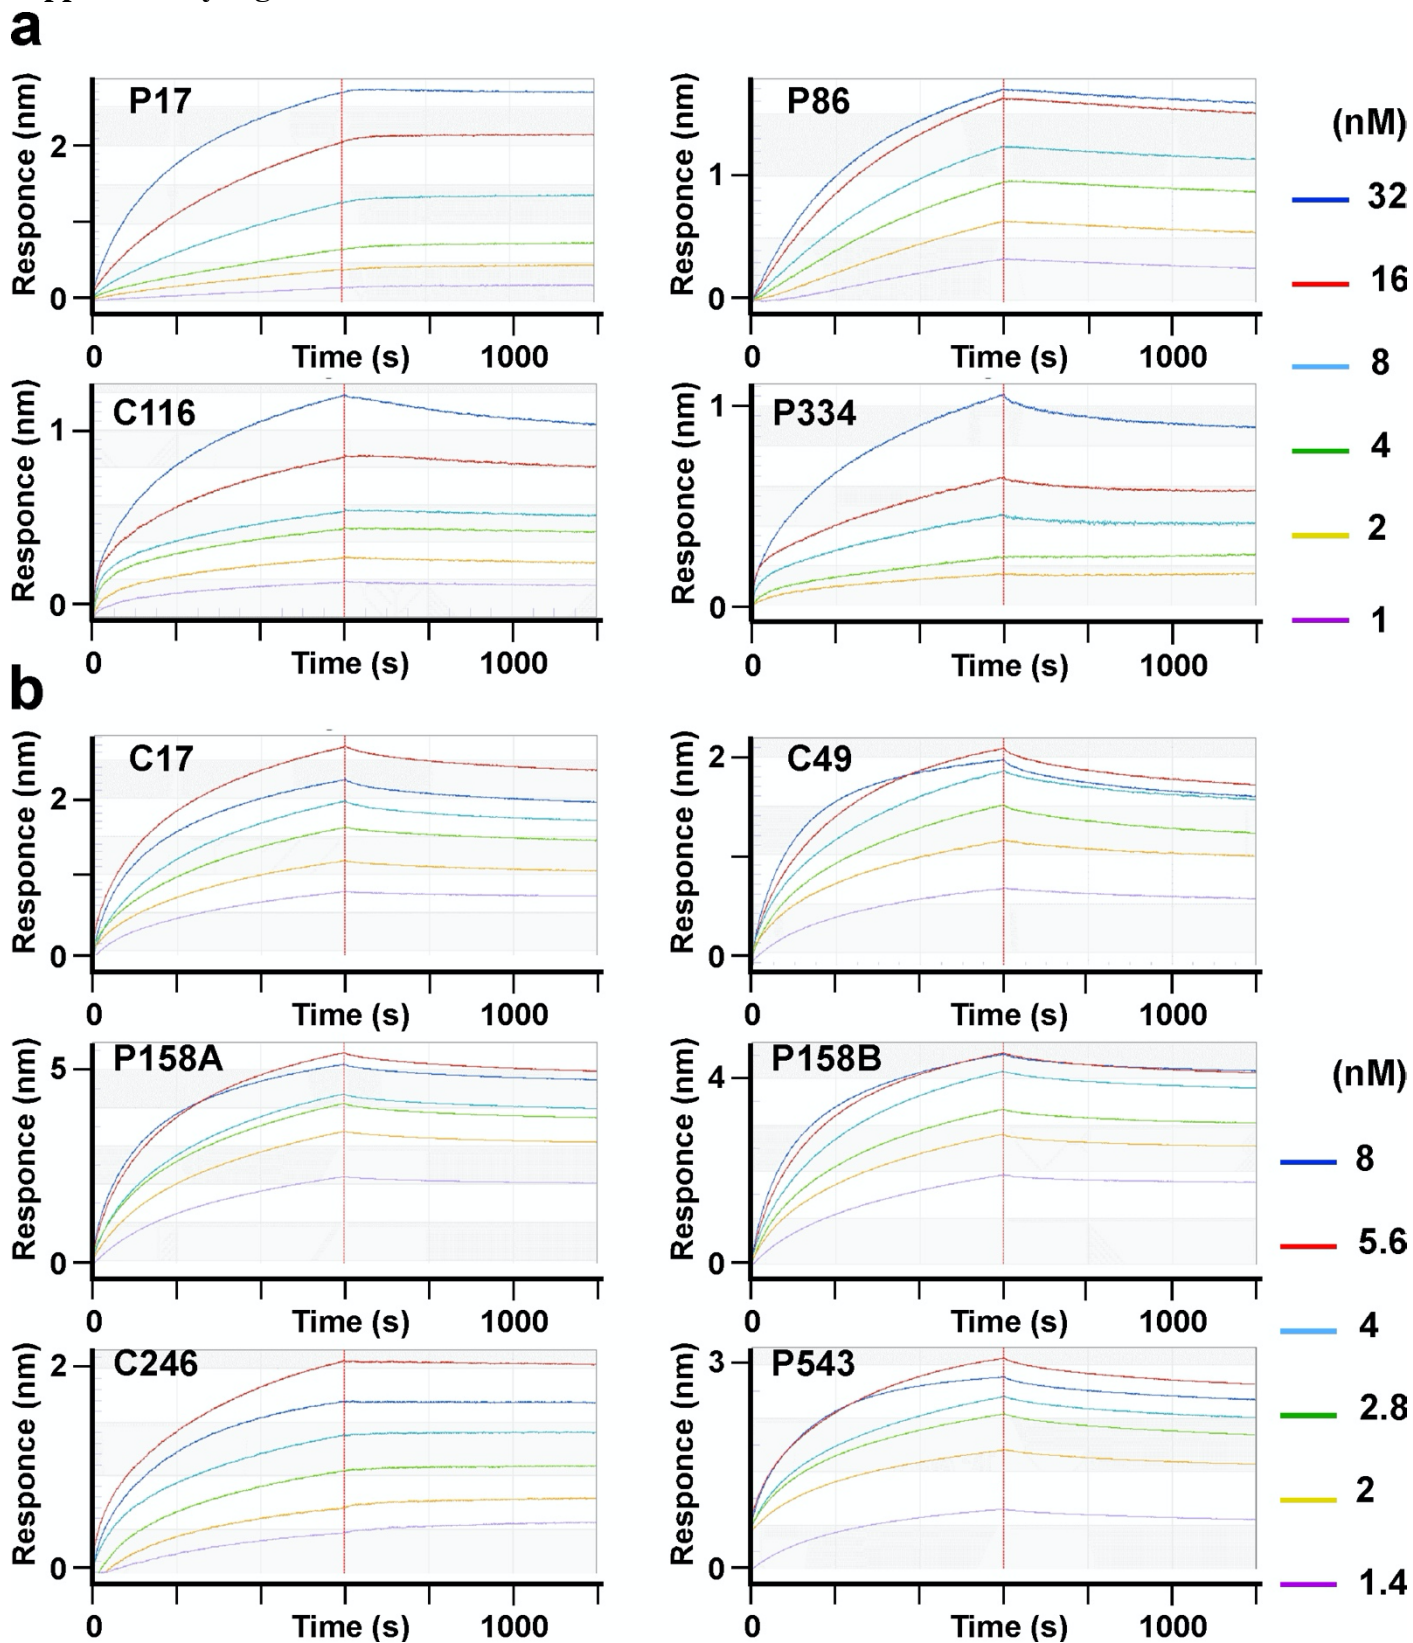

Supplementary Figure 3| Sensorgrams of kinetic assays. **a,b**, Sensorgrams of real-time kinetics assays using biolayer interferometry (BLI), showing five different concentrations of the purified SARS-CoV-2 spike in a high-salt buffer (**a**) or an anionic buffer (**b**).

Supplementary Figure 4

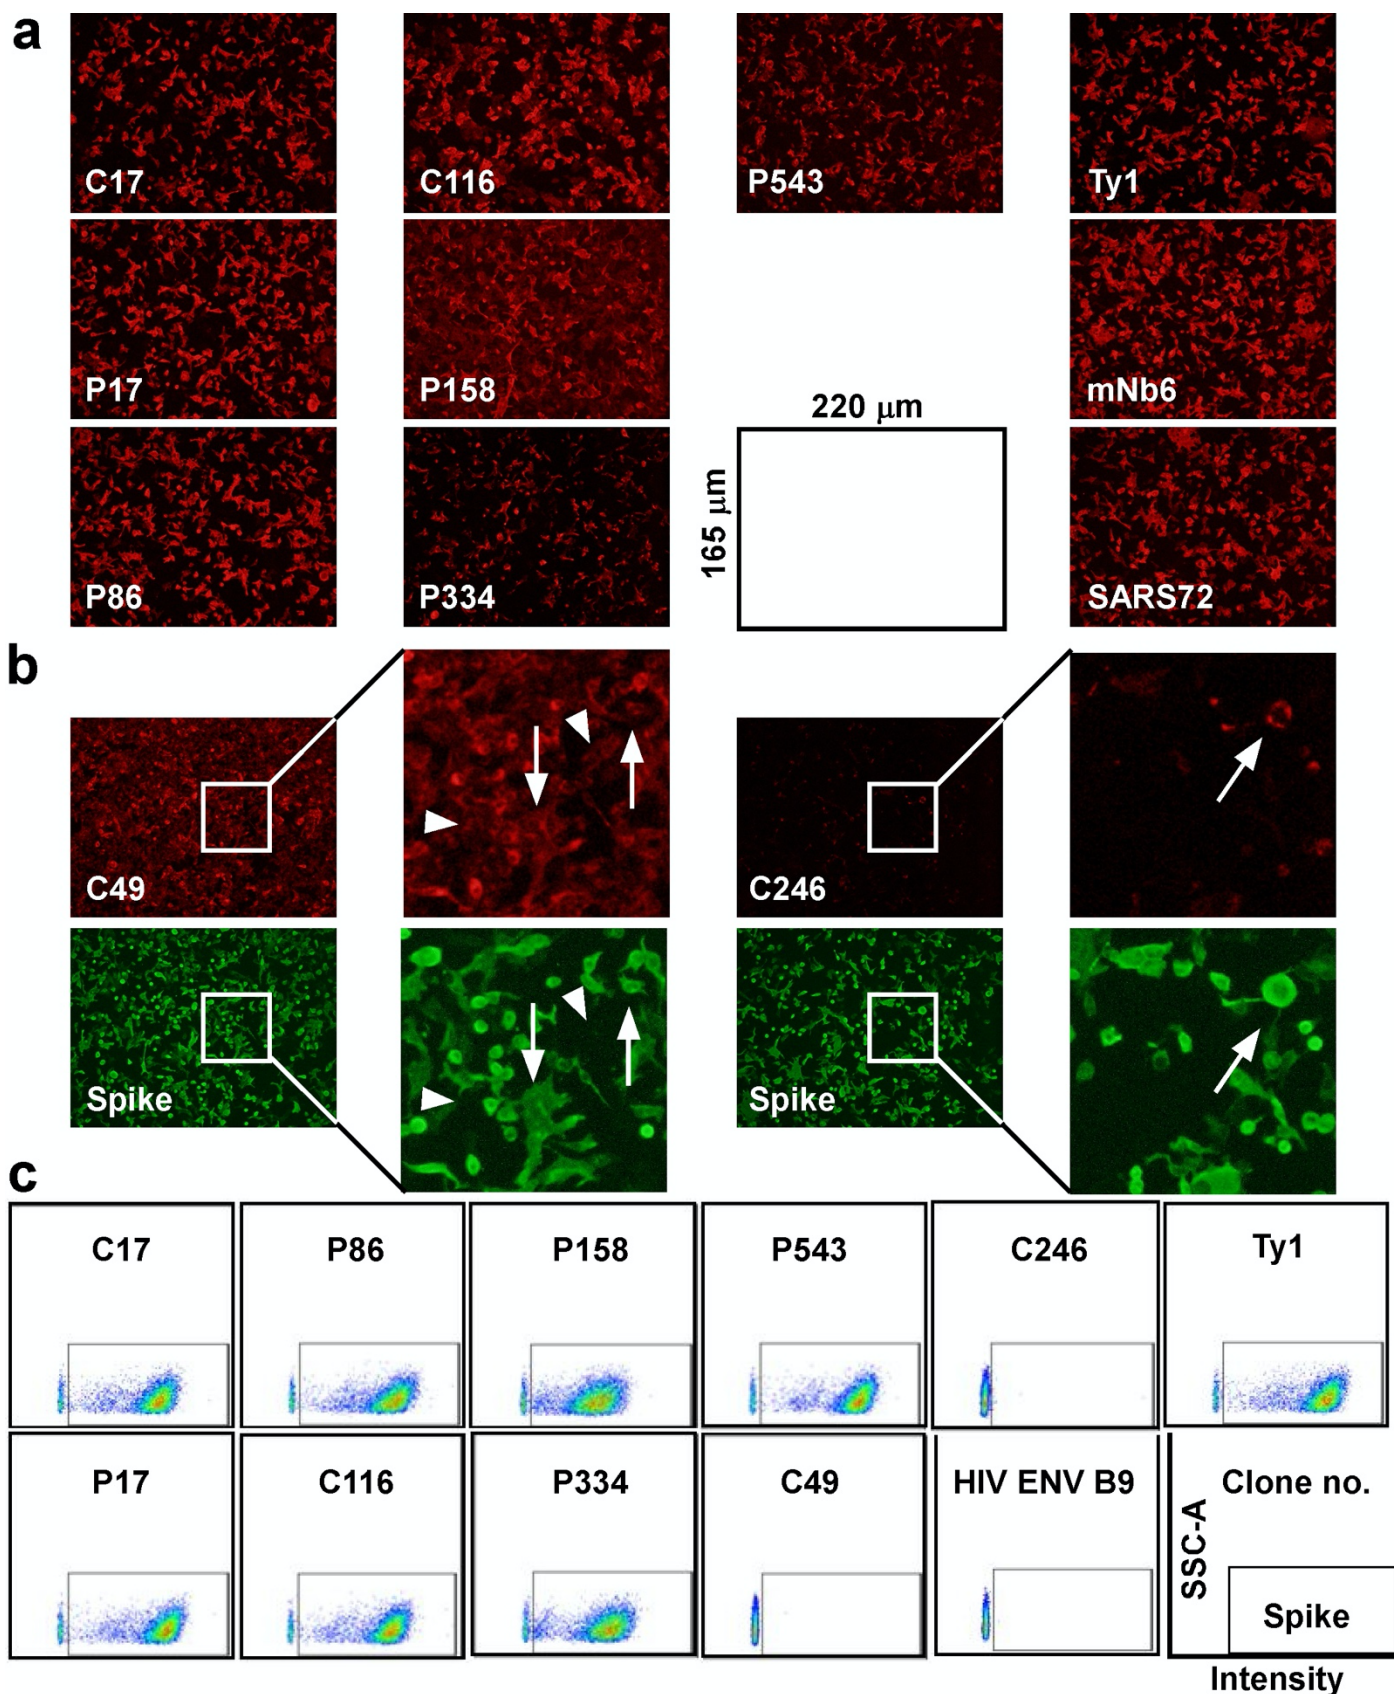

**Supplementary Figure 4 | Microscopy and flow cytometric analyses of anti-spike nanobodies. a,** Photographs of stained HEK293T cells expressing the C9-tagged SARS-CoV-2 spike. **b,** White squared regions show zoomed-in views: arrows indicate intracellularly stained SARS-CoV-2 spike (C49 and C246), and arrowheads indicate example background signals (C49). **c,** Flow cytometric analyses of K562 cells expressing the original SARS-CoV-2 spike—signals with Ty1 squared and B9: an anti-HIV-1 nanobody.



Supplementary Figure 5

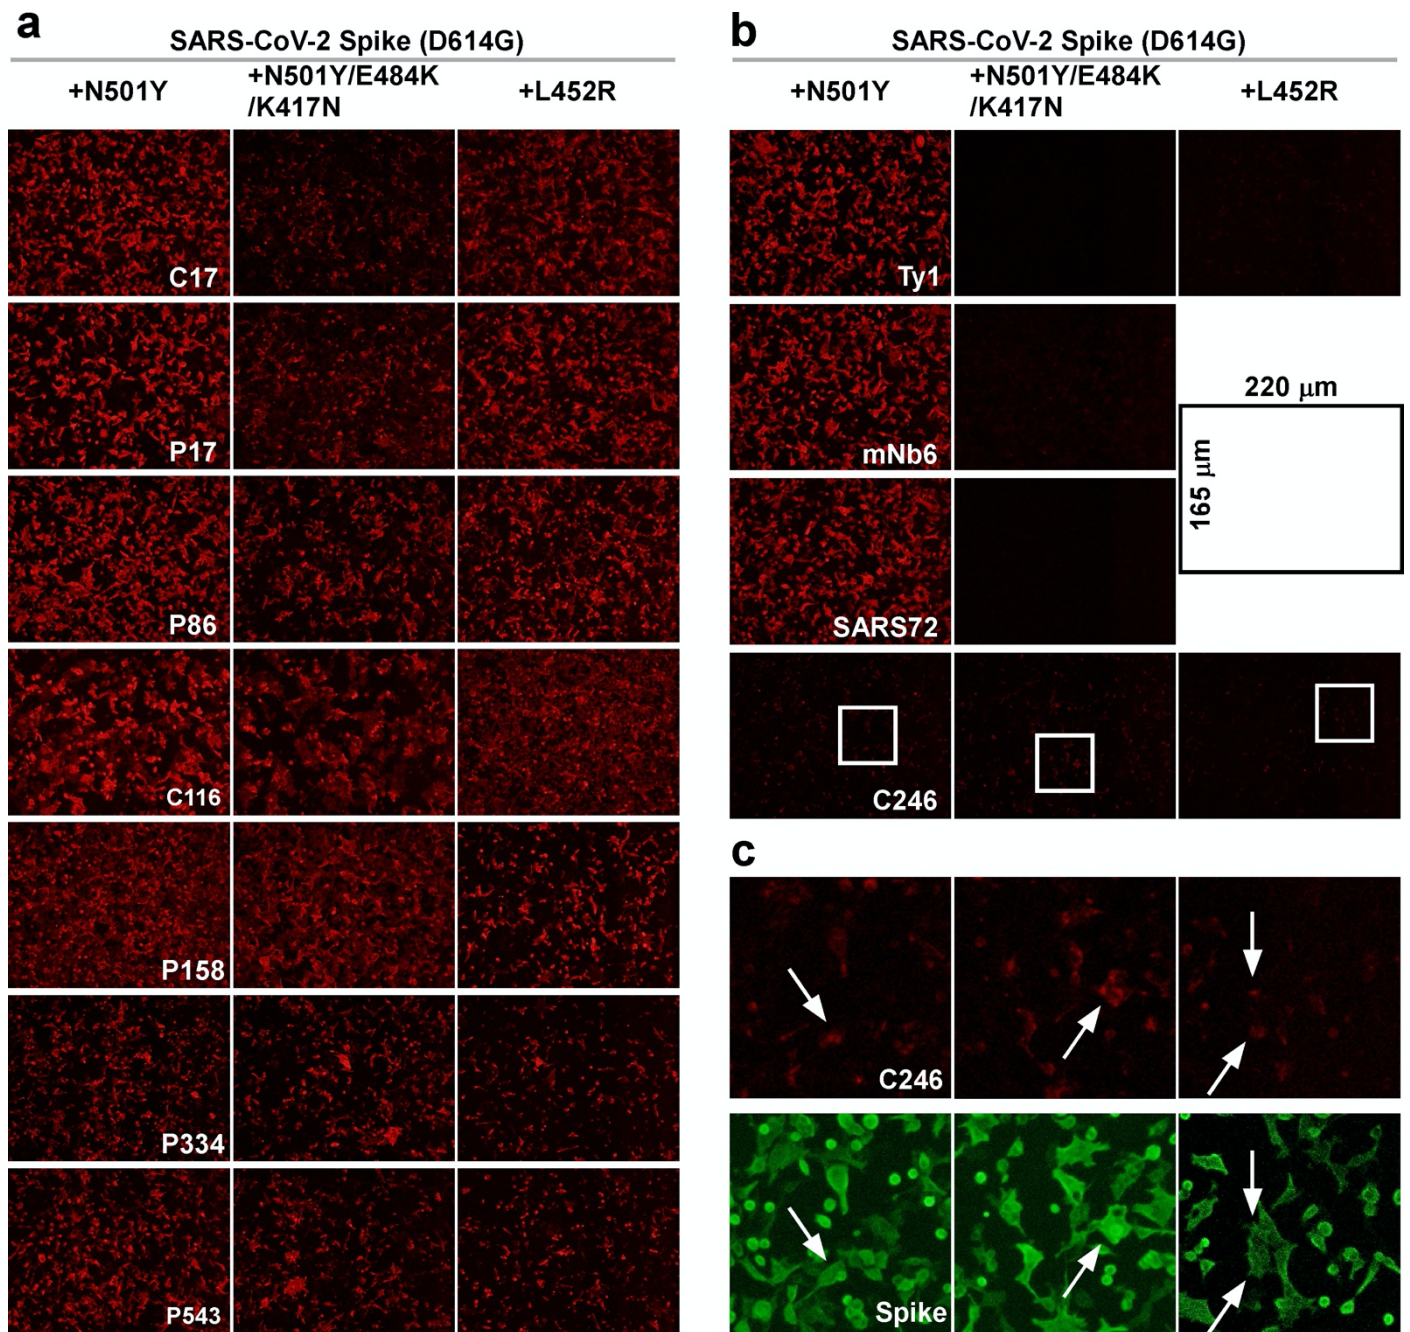

**Supplementary Figure 5| Microscopy analyses.** **a, b**, Photographs of stained HEK cells expressing the SARS-CoV-2 spike variants carrying mutations in the RBD, original (D614G); alpha (N501Y); beta (K417N, E484K, and N501Y); and delta (L452R), with generated (**a**) and previously reported (**b**) nanobodies. **c**, Zoomed-in views of regions highlighted with white squares in (**b**): C246 intracellularly stained all spike variants without background—indicated by white arrows.

Supplementary Figure 6

**a** P158-coated plate

| Detection |      | P17  | C17  | P158 | P334 | P543 | C116 | P86  | Ty1                        | Blocking |
|-----------|------|------|------|------|------|------|------|------|----------------------------|----------|
| -         | 0.04 | 0.07 | 0.11 | 0.06 | 0.06 | 0.03 | 0.04 | 0.05 | Carbo-Free (CF)            |          |
| +         | 0.28 | 0.26 | 0.31 | 0.14 | 0.37 | 0.11 | 0.15 | 0.05 |                            |          |
| -         | 0.02 | 0.04 | 0.04 | 0.03 | 0.06 | 0.01 | 0.04 | 0.02 | Skim-Milk (Milk)           |          |
| +         | 0.12 | 0.11 | 0.15 | 0.02 | 0.29 | 0.02 | 0.08 | 0.03 |                            |          |
| -         | 0.07 | 0.09 | 0.26 | 0.08 | 0.11 | 0.07 | 0.09 | 0.06 | Albumin (BSA)              |          |
| +         | 0.70 | 0.68 | 0.18 | 0.15 | 0.77 | 0.10 | 0.33 | 0.09 |                            |          |
| -         | 0.03 | 0.06 | 0.06 | 0.12 | 0.07 | 0.03 | 0.03 | 0.01 | Casein                     |          |
| +         | 0.10 | 0.11 | 0.27 | 0.03 | 0.13 | 0.04 | 0.07 | 0.03 |                            |          |
| -         | 0.14 | 0.18 | 0.21 | 0.12 | 0.13 | 0.07 | 0.10 | 0.22 | PVP (Polyvinylpyrrolidone) |          |
| +         | 0.22 | 0.24 | 0.19 | 0.12 | 0.26 | 0.07 | 0.16 | 0.14 |                            |          |
| -         | 0.07 | 0.20 | 0.26 | 0.11 | 0.26 | 0.09 | 0.16 | 0.11 | PBST (0.005% Tween20)      |          |
| +         | 0.64 | 0.71 | 0.31 | 0.12 | 0.59 | 0.06 | 0.31 | 0.11 |                            |          |

**Signal ratio**

|  | P17  | C17 | P158 | P334 | P543 | C116 | P86 | Ty1 |                                            |
|--|------|-----|------|------|------|------|-----|-----|--------------------------------------------|
|  | 6.4  | 3.9 | 2.9  | 2.2  | 6.6  | 3.6  | 3.7 | 0.9 | CF<br>Milk<br>BSA<br>Casein<br>PVP<br>PBST |
|  | 5.9  | 2.9 | 3.7  | 0.7  | 5.2  | 1.5  | 2.3 | 1.9 |                                            |
|  | 10.6 | 8.0 | 0.7  | 1.8  | 6.8  | 1.4  | 3.5 | 1.7 |                                            |
|  | 3.8  | 2.0 | 4.7  | 0.3  | 1.8  | 1.2  | 1.9 | 2.1 |                                            |
|  | 1.5  | 1.3 | 0.9  | 1.1  | 2.0  | 0.9  | 1.6 | 0.6 |                                            |
|  | 9.4  | 3.6 | 1.2  | 1.1  | 2.3  | 0.6  | 2.0 | 0.9 |                                            |

**b** Summary of ELISA conditions

| Capture: P158 |      | Blocking |      |      |        |      |
|---------------|------|----------|------|------|--------|------|
|               |      | CF       | Milk | BSA  | Casein | PBST |
| Detection     | P543 | 6.6      | 5.2  | 6.8  | <2.0   | 2.3  |
|               | P86  | 3.7      | 2.3  | 3.5  | <2.0   | 2.0  |
|               | P17  | 6.4      | 5.9  | 10.6 | 3.8    | 9.4  |
|               | C17  | 3.9      | 2.9  | 8.0  | 2.0    | 3.6  |
|               | P158 | 2.9      | 3.7  | <2.0 | 4.7    | <2.0 |

Supplementary Figure 6| ELISA condition screenings. **a**, P158 was coated on an ELISA plate as a capture antibody; five kinds of blocking solutions (grey)—Carbo-Free (CF), skim milk (Milk), bovine serum albumin (BSA), casein, polyvinylpyrrolidone (PVP), and nonblocking saline (PBST)—were tested. Signals from 2 µg of the purified SARS-CoV-2 spike (+) or blocking buffer only (-) were compared among eight clones used as detection antibodies. Measured optical densities (OD=450 nm) and signal ratios (relative changes in OD<sub>450 nm</sub> with (+) compared to without the spike protein (-)) are gradually coloured from green (low) to red (high). **b**, Summary of the top five detection antibodies and appropriate blocking conditions for the P158-based sandwich ELISA: ratios >3.0 are shown in black.



Supplementary Figure 7

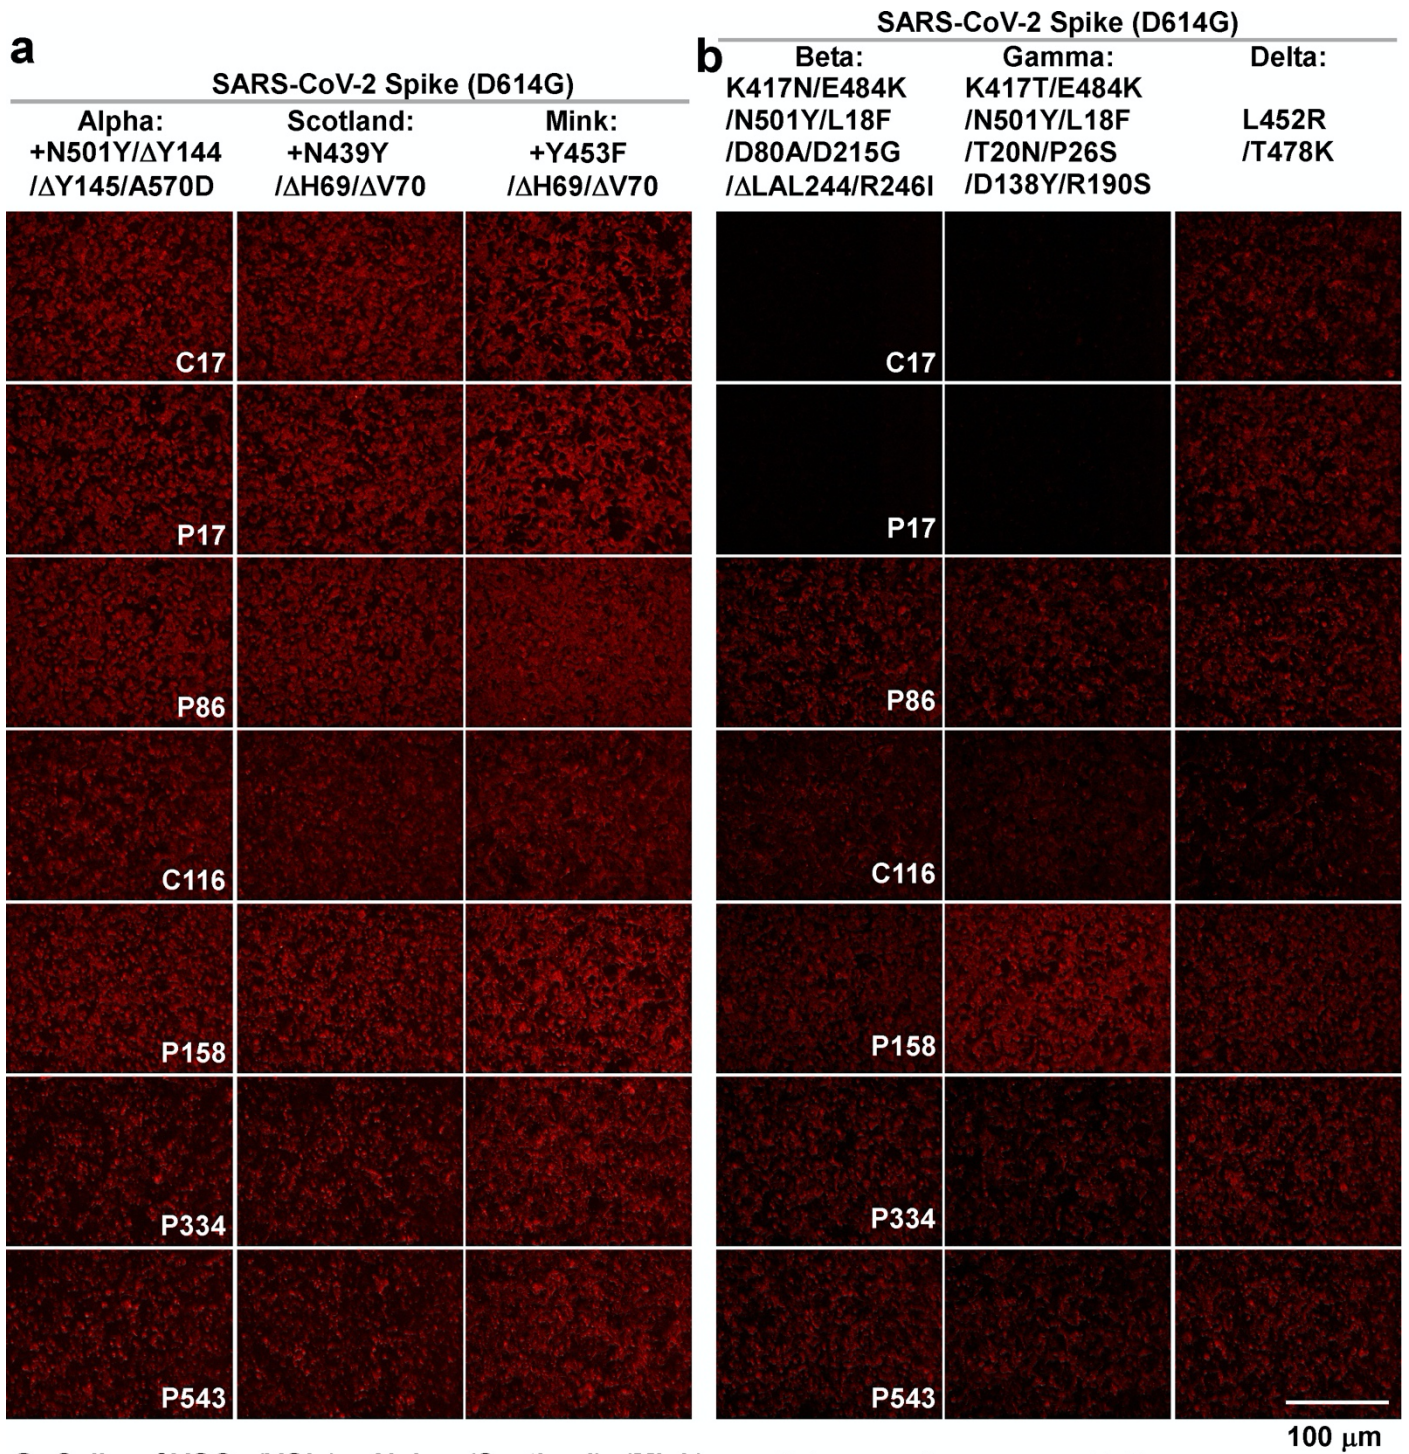

**c** Spike of VOCs (VOIs):

|      | Alpha | (Scotland) | (Mink) | Beta | Gamma | Delta |
|------|-------|------------|--------|------|-------|-------|
| C17  | +     | +          | +      | -    | -     | +     |
| P17  | +     | +          | +      | -    | -     | +     |
| P86  | +     | +          | +      | +    | +     | +     |
| C116 | +     | +          | +      | +/-  | +/-   | +/-   |
| P158 | +     | +          | +      | +    | +     | +     |
| P334 | +     | +          | +      | +    | +     | +     |
| P543 | +     | +          | +      | +    | +     | +     |

**Supplementary Figure 7| Microscopy analyses.** Photographs of stained HEK cells expressing the SARS-CoV-2 spike (D614G) variants carrying mutations in the S1 domain: **a, b**, alpha (N501Y, delY144, delY145, and A570D); Scotland (N439Y, delV69, and delH70); Danish mink (Y453F, delV69, and delH70); beta (K417N, E484K, N501Y, L18F, D80A, D215G, delL242, delA243, delL244, and R246I); gamma (K417T, E484K, N501Y, L18F, T20N, P26S, D138Y, and R190S); and delta (L452R and T478K). **c**, Results of microscopy analyses are summarized: +) positive; +-) weak; or -) negative. The SARS-CoV-2 spike variants of interest (VOIs)—Scotland and Danish mink—are shown in parentheses.



## Supplementary Figure 8

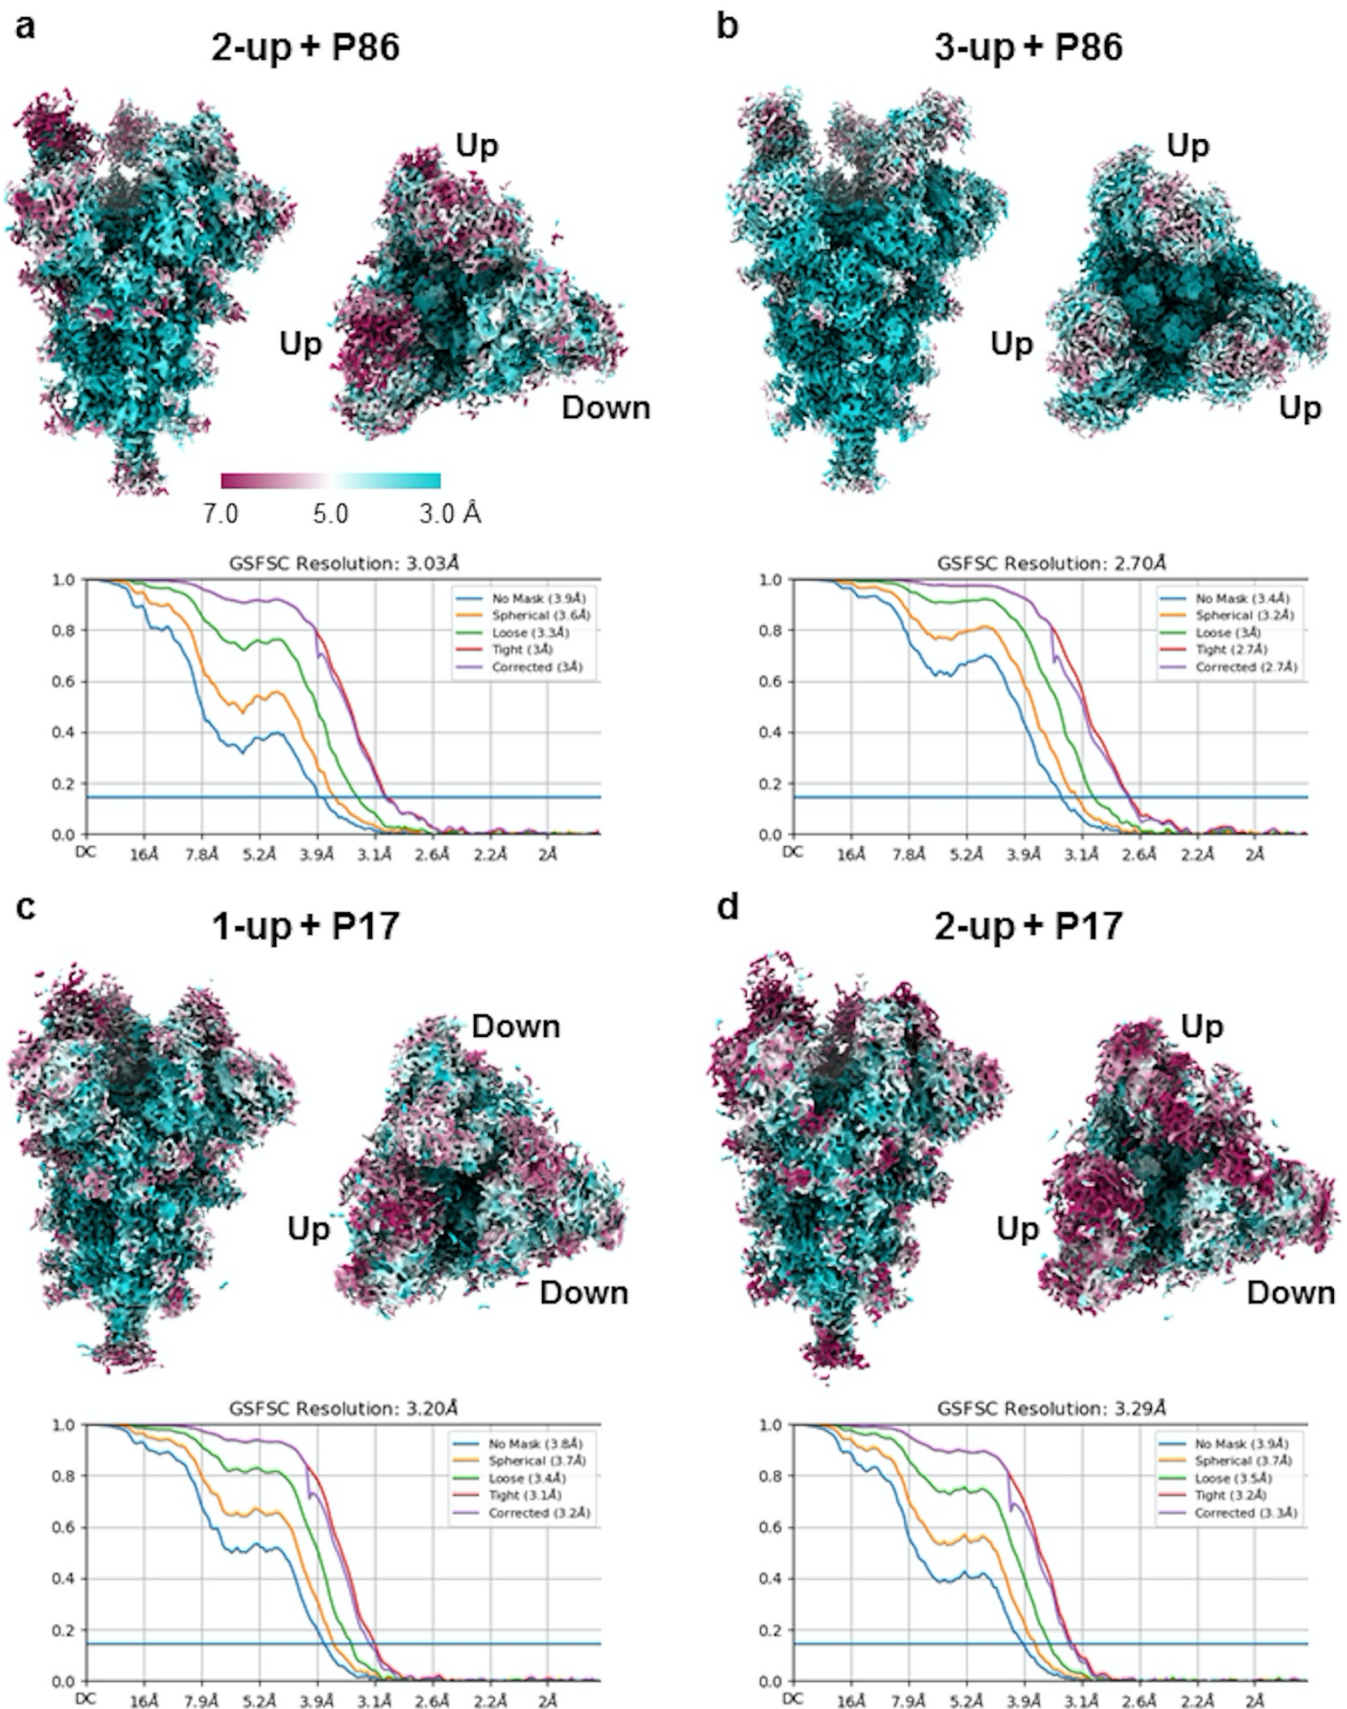

**Supplementary Figure 8 | Cryo-EM density maps of spike-nanobody complexes SARS-CoV-2 spike-P17 complexes. a-d**, Upper panels show final sharpened maps of 2-up+P86 (a), 3-up+P86 (b), 1-up+P17 (c), and 2-up+P17 (d) datasets from side views (left) and top views (right) coloured by local resolutions (3.0-7.0 Å). Lower panels show the Fourier shell correlation (FSC) curves for the corresponding final maps of the datasets.

Supplementary Figure 9

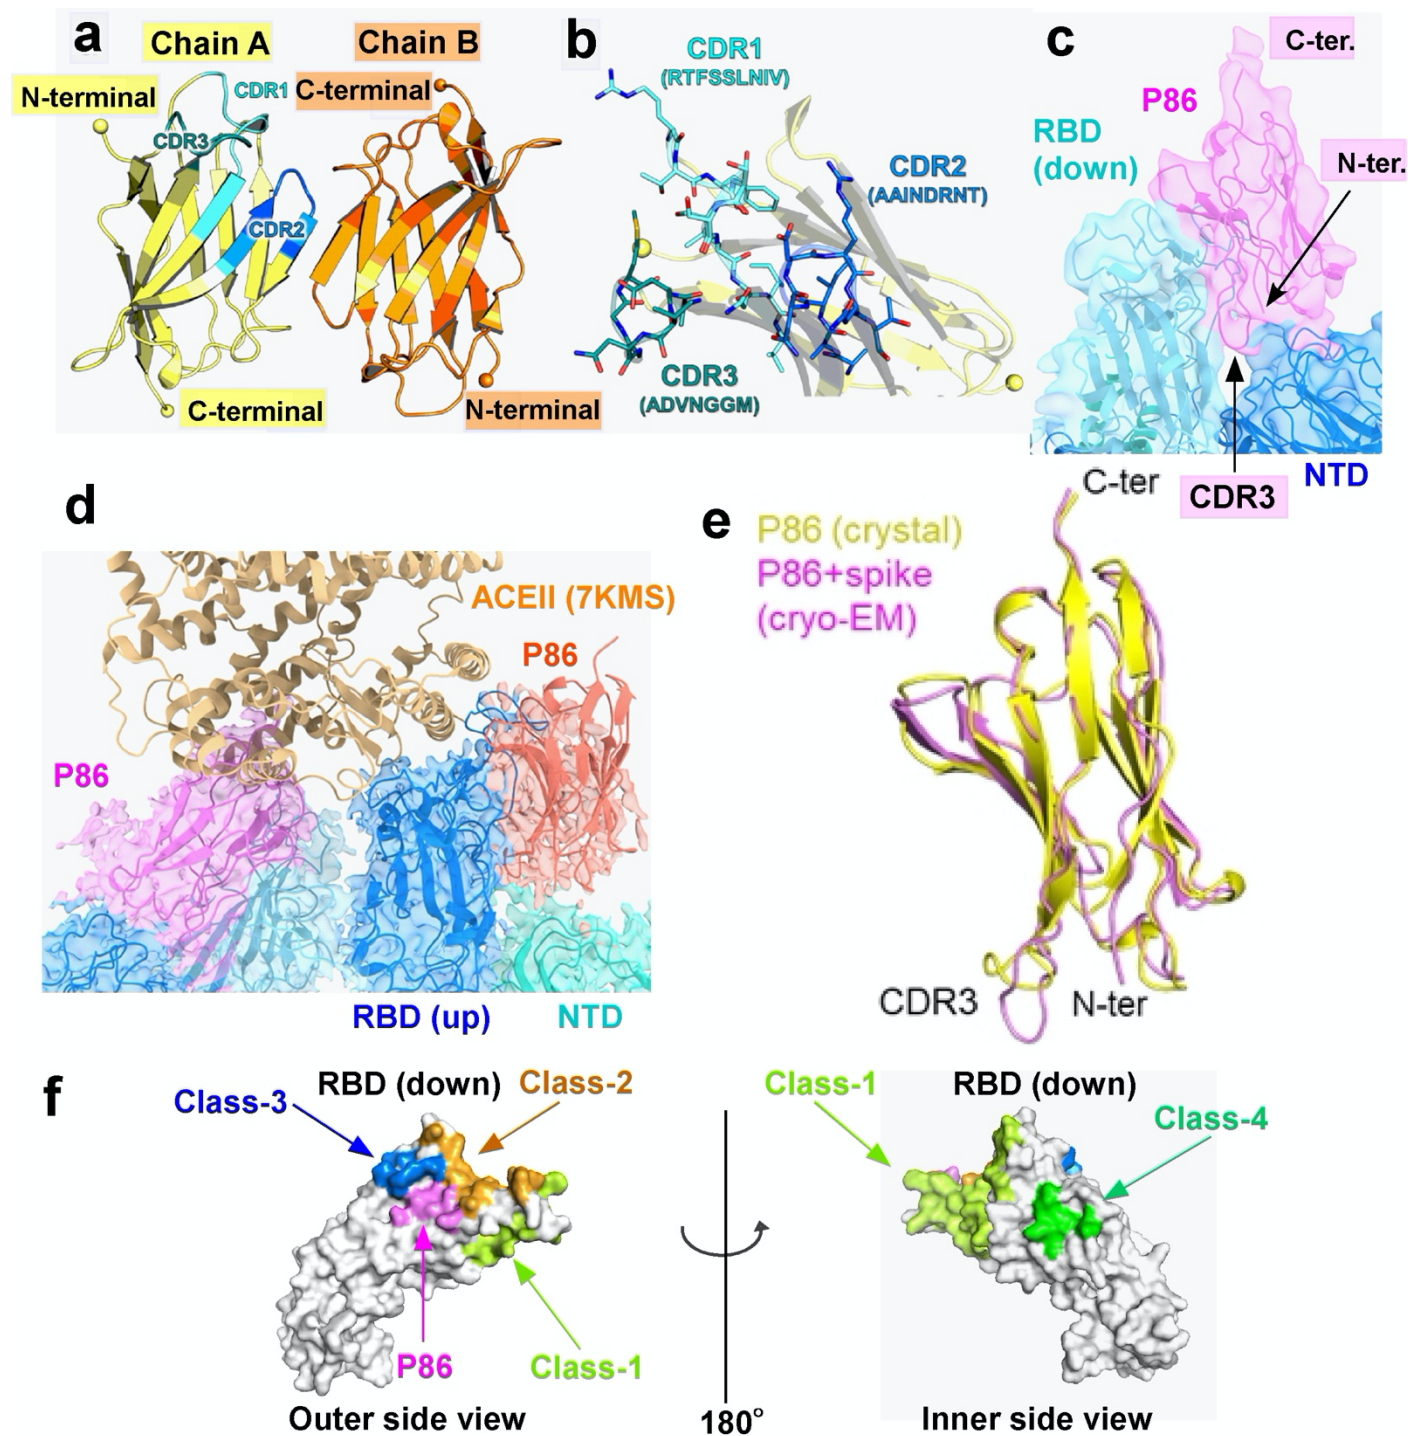

**Supplementary Figure 9 | Crystal structure of P86.** **a**, Two P86 monomers in the asymmetric unit. Chain A and Chain B are almost identical, with a root mean square deviation for  $C_{\alpha}$  atoms of 0.20 Å. **b**, Close-up view of three CDR regions in Chain A. **c**, Sharpened map from local refinement (5.13 Å resolution at FSC=0.143) around P86 bound to the down-RBD with our fitted model. **d**, Close-up view around P86 bound to the up-RBD with our fitted model structure. The model of ACEII bound to the spike trimer (PDB entry: 7KMS) is superposed on the up-RBD shown in blue. **e**, Structure comparison between P86 alone (crystal structure) and P86 complexed with spike trimer (cryo-EM). **f**, Epitope mapping on the down-RBD. The epitopes of Class-1 to Class-4 compared to P86.



Supplementary Figure 10

**a** Side view

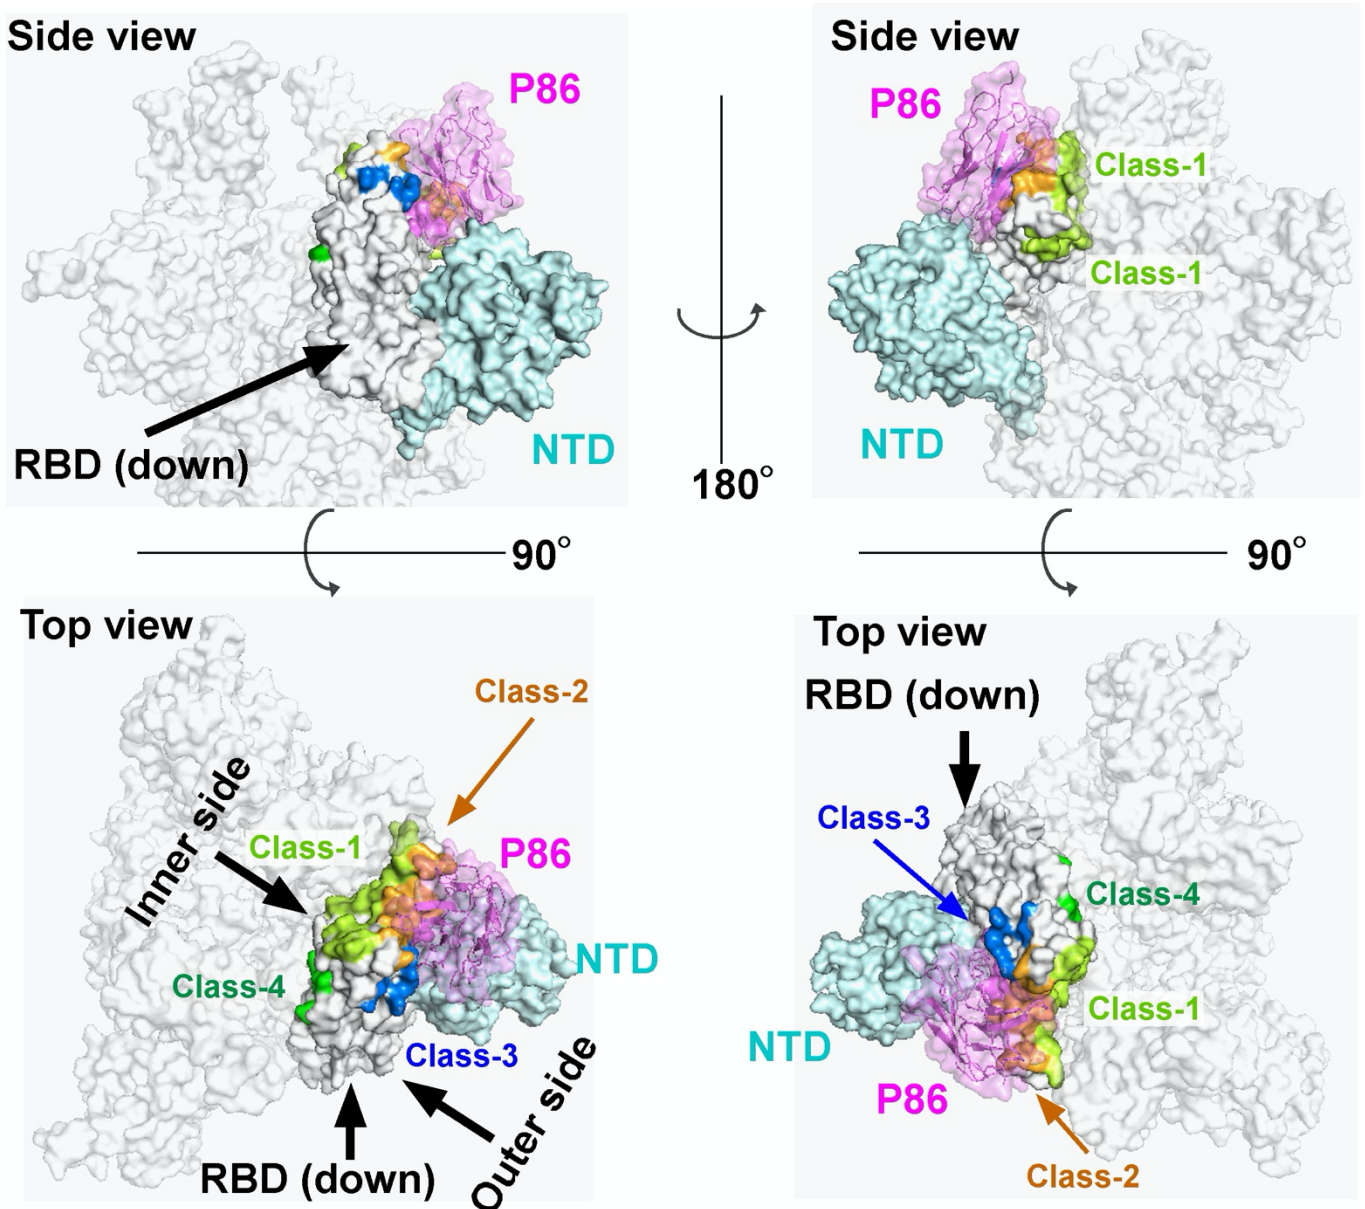

Supplementary Figure 10| The fitting model of P86 and the SARS-CoV-2 spike trimer. **a**, The down-RBD, the neighbouring NTD, and P86 are coloured white, cyan, and pink, respectively; other domains and molecules of the SARS-CoV-2 spike trimer are in reduced transparency.

Supplementary Figure 11

**a** Figure 2a

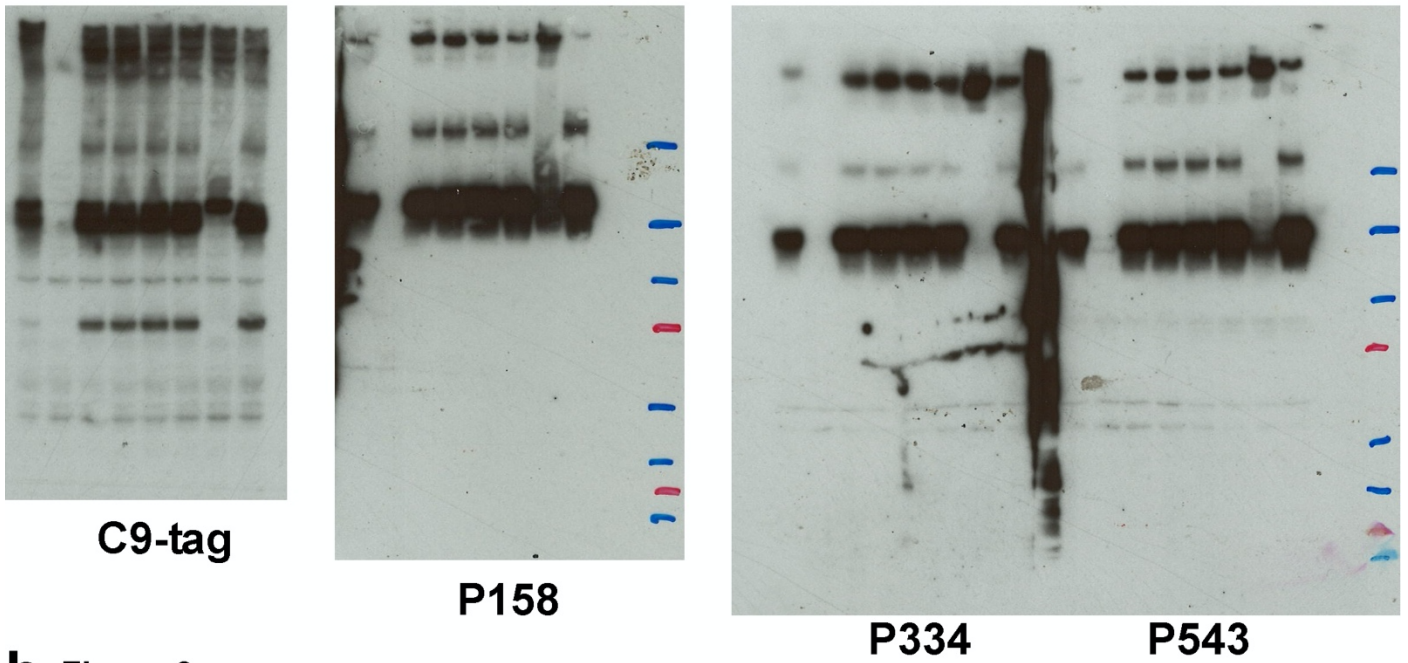

**b** Figure 3a

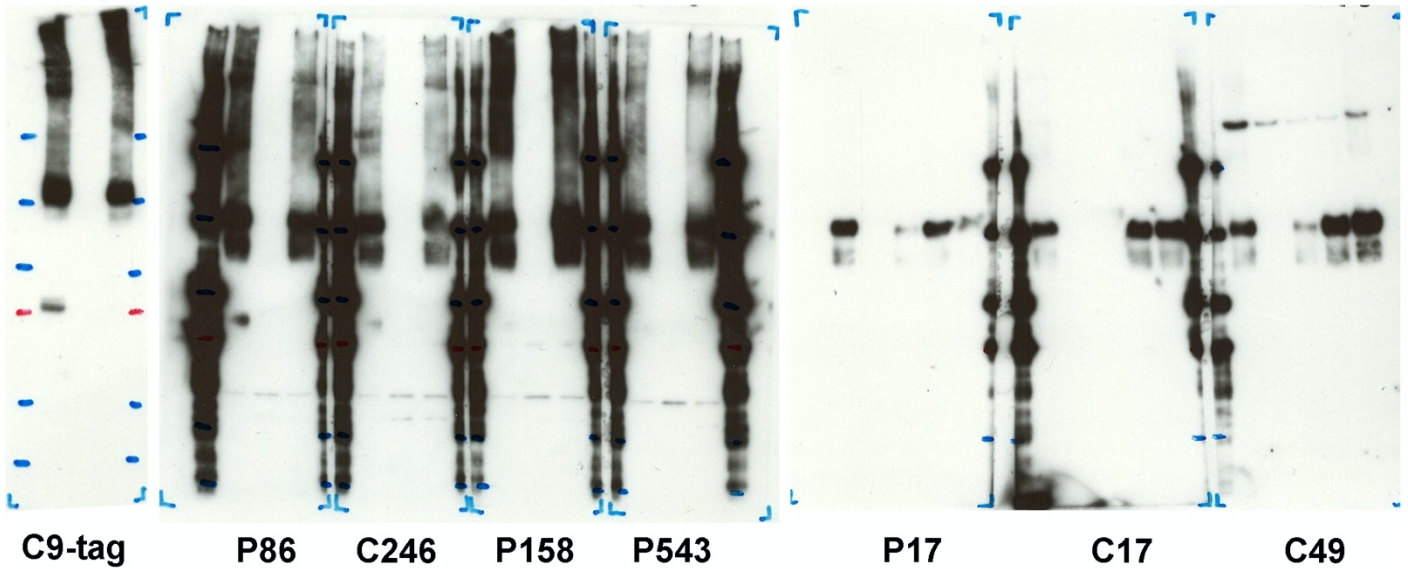

**c** Figure 4a

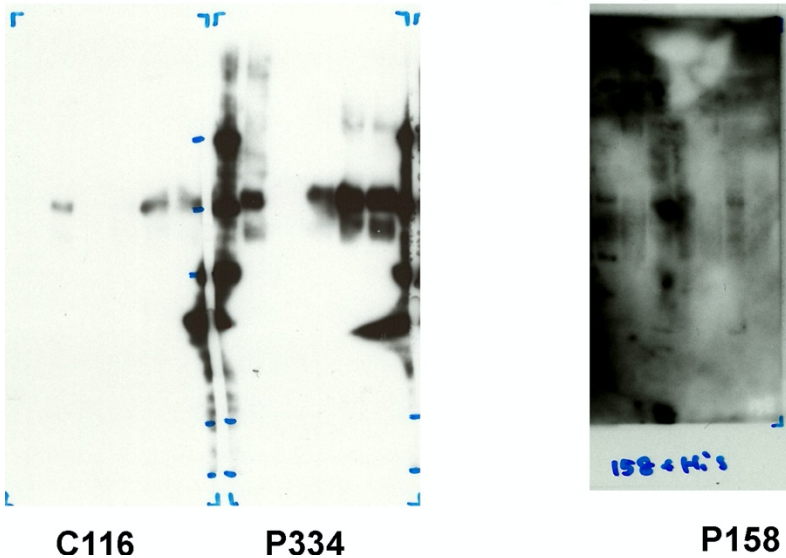

Figure 4b

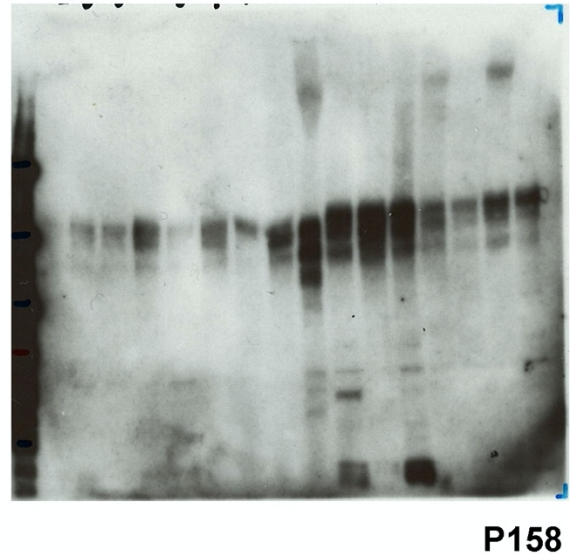

**Supplementary Table 1| Comparison of the epitopes of Up-RBD+P86 via Protein Interface, Surfaces, and Assemblies (PISA).**

| No. residues     | Accessible Surface Area (Up) | Buried Surface Area and Bonds (H, S)* (Up) | Solvation Energy Effect: $\Delta G$ (Up) | Accessible Surface Area (Down) | Buried Surface Area and Bonds (H, S)* (Down) | Solvation Energy Effect: $\Delta G$ (Down) |       |
|------------------|------------------------------|--------------------------------------------|------------------------------------------|--------------------------------|----------------------------------------------|--------------------------------------------|-------|
| <u>BA.1+BA.2</u> | $\text{\AA}^2$               | $\text{\AA}^2$                             | kcal mol <sup>-1</sup>                   | $\text{\AA}^2$                 | $\text{\AA}^2$                               | kcal mol <sup>-1</sup>                     |       |
| 344              | Ala                          | 25.1                                       | 0                                        | 0                              | 31.53                                        | 0                                          | 0     |
| 345              | Thr                          | 110.91                                     | 0                                        | 0                              | 124.78                                       | 0                                          | 0     |
| <u>346</u>       | <u>Arg</u>                   | 173.84                                     | 77.26 (S)                                | -1.54                          | 192.26                                       | 72.1                                       | -0.75 |
| 347              | Phe                          | 21.45                                      | 9.37                                     | -0.08                          | 10.98                                        | 5.73                                       | -0.02 |
| 348              | Ala                          | 28.97                                      | 26.55                                    | 0.37                           | 15.75                                        | 15.75                                      | 0.25  |
| 349              | Ser                          | 11.77                                      | 9.43 (H)                                 | -0.08                          | 3.61                                         | 3.61                                       | 0.25  |
| 350              | Val                          | 0                                          | 0                                        | 0                              | 0                                            | 0                                          | 0     |
| 351              | Tyr                          | 74.5                                       | 62.49                                    | -0.03                          | 78.1                                         | 70.74 (H)                                  | 0.27  |
| 352              | Ala                          | 48.52                                      | 48.02 (H)                                | 0.57                           | 9.91                                         | 5.39                                       | 0.03  |
| 353              | Trp                          | 30.81                                      | 26.59                                    | 0.08                           | 9.86                                         | 0.49                                       | -0.01 |
| 354              | Asn                          | 64                                         | 32.34 (H)                                | -0.23                          | 60.18                                        | 27.1                                       | -0.05 |
| 355              | Arg                          | 103.72                                     | 18.72                                    | 0.14                           | 71.68                                        | 5.51                                       | -0.06 |
| 356              | Lys                          | 51.9                                       | 0                                        | 0                              | 91.92                                        | 0                                          | 0     |
| 357              | Arg                          | 144.31                                     | 0                                        | 0                              | 141.1                                        | 0                                          | 0     |
| 445              | Val                          | 154.15                                     | 0                                        | 0                              | 137.36                                       | 0                                          | 0     |
| <u>446</u>       | <u>Gly</u>                   | 20.66                                      | 0                                        | 0                              | 11.42                                        | 0                                          | 0     |
| 447              | Gly                          | 26.79                                      | 8.7                                      | 0.14                           | 32.48                                        | 0                                          | 0     |
| 448              | Asn                          | 3.92                                       | 3.92                                     | -0.04                          | 95.95                                        | 36.09 (H)                                  | 0.13  |
| 449              | Tyr                          | 86.46                                      | 29.68                                    | 0.38                           | 45.61                                        | 7.23                                       | 0     |
| 450              | Asn                          | 20.7                                       | 13.06                                    | -0.15                          | 33.66                                        | 25.14                                      | -0.26 |
| 451              | Tyr                          | 116.94                                     | 76.62                                    | 0.96                           | 47.31                                        | 39.99 (H)                                  | 0.56  |
| 452              | Leu                          | 43.32                                      | 37.5                                     | 0.6                            | 64.98                                        | 62.3 (H)                                   | 1     |
| 453              | Tyr                          | 39.66                                      | 0                                        | 0                              | 36.07                                        | 0                                          | 0     |
| 454              | Arg                          | 21.47                                      | 0                                        | 0                              | 4.62                                         | 0                                          | 0     |
| 464              | Phe                          | 80.55                                      | 0                                        | 0                              | 50.92                                        | 0                                          | 0     |
| 465              | Glu                          | 59.93                                      | 0                                        | 0                              | 42.78                                        | 0                                          | 0     |
| 466              | Arg                          | 3.58                                       | 0.44                                     | -0.01                          | 155.78                                       | 86.19 (H, S)                               | -1.91 |
| 467              | Asp                          | 123.2                                      | 23.66                                    | 0.02                           | 38.29                                        | 0                                          | 0     |
| 468              | Ile                          | 79.87                                      | 47.65                                    | 0.38                           | 69.49                                        | 43.98                                      | 0.7   |
| 469              | Ser                          | 58.67                                      | 1.34                                     | 0.02                           | 57.58                                        | 0                                          | 0     |
| 470              | Thr                          | 47.03                                      | 37.4                                     | 0.09                           | 49.99                                        | 39.84                                      | 0.36  |
| 471              | Glu                          | 117.88                                     | 65.91 (H)                                | 0.15                           | 140.23                                       | 104.47 (H)                                 | -0.62 |

|            |            |        |            |       |        |            |       |
|------------|------------|--------|------------|-------|--------|------------|-------|
| 472        | Ile        | 32.26  | 1          | 0.02  | 34.84  | 0          | 0     |
| 473        | Tyr        | 51.04  | 0          | 0     | 20.84  | 0          | 0     |
| 474        | Gln        | 71.55  | 0          | 0     | 13.1   | 0          | 0     |
| 475        | Ala        | 32.8   | 0          | 0     | 30.71  | 0          | 0     |
| 476        | Gly        | 4.57   | 0          | 0     | 62.89  | 0          | 0     |
| <u>477</u> | <u>Ser</u> | 95.29  | 0          | 0     | 86.67  | 0          | 0     |
| <u>478</u> | <u>Thr</u> | 123.99 | 0          | 0     | 34.24  | 0          | 0     |
| 479        | Pro        | 65.07  | 0          | 0     | 82.4   | 0          | 0     |
| 480        | Cys        | 101.19 | 0          | 0     | 95.47  | 6.5 (H)    | -0.07 |
| 481        | Asn        | 122.21 | 46.78 (H)  | -0.54 | 95.46  | 1.67       | 0.03  |
| 482        | Gly        | 47.69  | 35.42 (H)  | -0.07 | 80.11  | 59.16      | -0.3  |
| 483        | Val        | 117.5  | 103.34 (H) | 1.39  | 45.42  | 31.64 (H)  | 0.08  |
| <u>484</u> | <u>Glu</u> | 11.41  | 5.08       | -0.05 | 101.28 | 29.07 (H)  | 0.02  |
| 485        | Gly        | 70.05  | 37.63 (H)  | 0.16  | 0      | 0          | 0     |
| 486        | Phe        | 116.09 | 0          | 0     | 0      | 0          | 0     |
| 487        | Asn        | 84.63  | 0          | 0     | 0      | 0          | 0     |
| 488        | Cys        | 56.1   | 29.74      | 0.13  | 38.53  | 5.76       | 0.24  |
| 489        | Tyr        | 179.1  | 3.17       | 0.05  | 0      | 0          | 0     |
| 490        | Phe        | 11.21  | 6.25       | 0.05  | 92.52  | 72.76      | 1.16  |
| 491        | Pro        | 13.66  | 0          | 0     | 0      | 0          | 0     |
| 492        | Leu        | 88.49  | 79.6       | 1.13  | 53.01  | 43.04      | 0.41  |
| <u>493</u> | <u>Gln</u> | 98.13  | 75.32 (H)  | 0.31  | 60.1   | 19.21      | -0.08 |
| 494        | Ser        | 96.92  | 6.52       | 0.1   | 74.39  | 37.03      | 0.14  |
| 495        | Tyr        | 13.89  | 13.89      | -0.15 | 24.32  | 11.03      | -0.13 |
| <u>496</u> | <u>Gly</u> | 30.17  | 12.9       | 0.21  | 28.5   | 3.84       | 0.06  |
| 497        | Phe        | 14.23  | 13.45 (H)  | -0.15 | 12.94  | 12.94 (H)  | 0     |
| <u>498</u> | <u>Gln</u> | 93.16  | 37.94      | 0.06  | 75.68  | 24.12      | -0.24 |
| 499        | Pro        | 71.07  | 2.68       | 0.04  | 0      | 0          | 0     |
| 500        | Thr        | 104.74 | 0          | 0     | 0      | 0          | 0     |
| <u>501</u> | <u>Asn</u> | 18.17  | 0          | 0     | 0      | 0          | 0     |
| 502        | Gly        | 47.26  | 0          | 0     | 0      | 0          | 0     |
| 108        | Thr        |        |            |       | 0      | 0          | 0     |
| 109        | Thr        |        |            |       | 142.27 | 8.75       | 0.06  |
| 129        | Lys        |        |            |       | 0      | 0          | 0     |
| 130        | Val        |        |            |       | 56.73  | 13.39      | 0.21  |
| 158        | Arg        |        |            |       | 175.29 | 0          | 0     |
| 159        | Val        |        |            |       | 18.68  | 0          | 0     |
| 160        | Tyr        |        |            |       | 94.9   | 22.88      | 0.37  |
| 161        | Ser        |        |            |       | 97.2   | 4.17       | -0.02 |
| 162        | Ser        |        |            |       | 165.42 | 106.89 (H) | 0.2   |
| 230        | Pro        |        |            |       | 94.51  | 0          | 0     |

|     |     |  |  |  |        |           |       |
|-----|-----|--|--|--|--------|-----------|-------|
| 231 | Ile |  |  |  | 18.32  | 2.87      | -0.03 |
| 232 | Gly |  |  |  | 63.8   | 11.33 (H) | -0.13 |
| 233 | Ile |  |  |  | 54.69  | 9.66      | 0.15  |
| 234 | Asn |  |  |  | 104.25 | 0         | 0     |

Bonds\*: hydrogen bond (H) and salt bridge (S)

The mutations seen in the BA.1 and the BA.2 lineages are underlined.

The R346K mutation is seen in the BA.1+ lineages.

Residues 108 to 234 are in the NTD.
